# Supplementary material for: Newborn and Early Infant Outcomes Following Maternal COVID-19 Vaccination During Pregnancy
Source: PubMed Central journal article supplement — JAMA Pediatr. 2023 Oct 23;177(12):1314–23. doi: 10.1001/jamapediatrics.2023.4499 (PMC10594175; doi:10.1001/jamapediatrics.2023.4499), 2023-10-23
Supplement: jamapediatr-e234499-s001.pdf [file jamapediatr-e234499-s001.pdf]

## Supplemental Online Content

Jorgensen SCJ, Drover SSM, Fell DB, et al. Newborn and early infant outcomes following maternal COVID-19 vaccination during pregnancy. *JAMA Pediatr*. Published online October 23, 2023. doi:10.1001/jamapediatrics.2023.4499

**eFigure 1.** Standardized differences for baseline characteristics before and after weighting using stabilized inverse probability of treatment weights

**eFigure 2.** Overlap in propensity score distributions by exposure group before and after weighting using stabilized inverse probability of treatment weights

**eFigure 3.** Bias analyses for severe neonatal morbidity: percent bias as a function of the prevalence of the hypothetical confounder in the vaccine exposed group

**eTable 1.** Linked health administrative databases

**eTable 2.** Severe neonatal morbidity indicator

**eTable 3.** Additional newborn and infant outcome analyses

**eTable 4.** Array approach sensitivity analyses for unmeasured potential confounders

This supplemental material has been provided by the authors to give readers additional information about their work.

eFigure 1: Standardized differences for baseline characteristics in propensity score before and after weighting using stabilized inverse probability of treatment weights

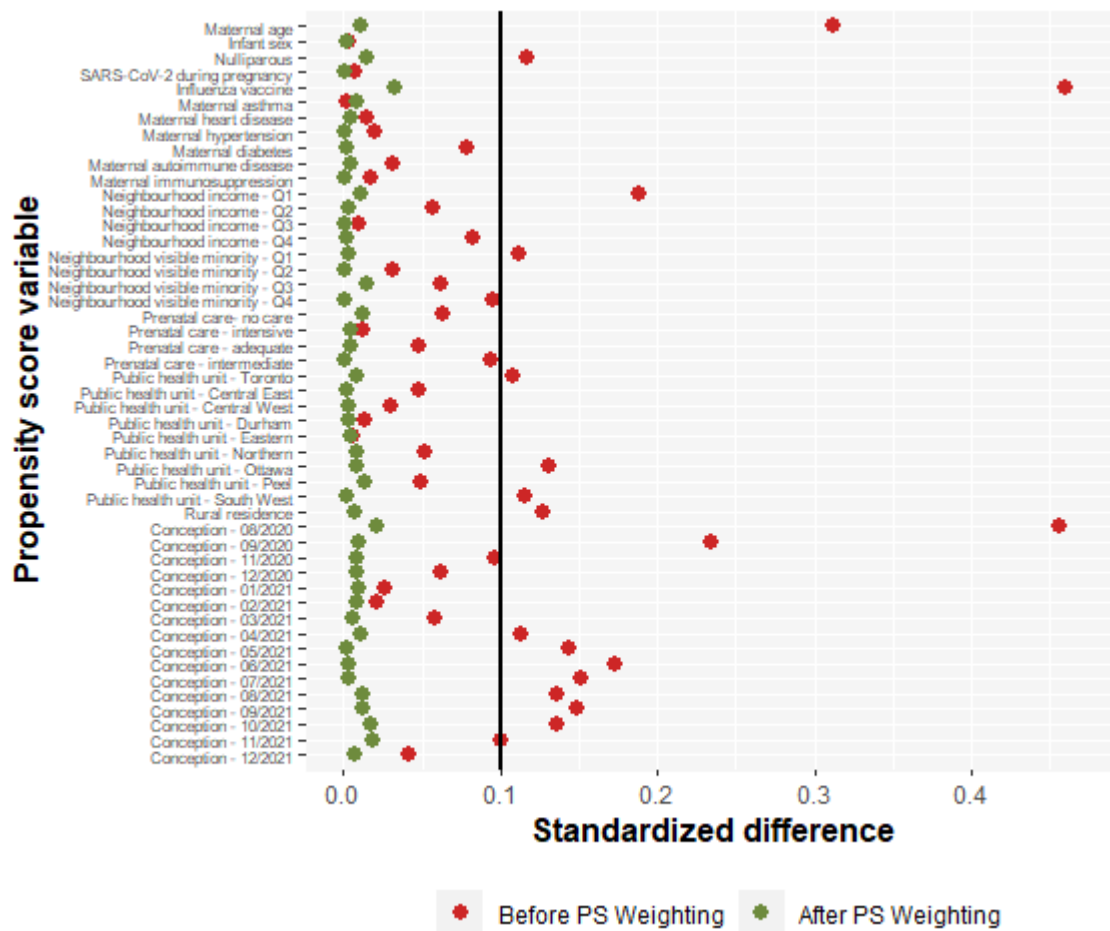

Abbreviations: PS: propensity score; Q: quintile.  
 Absolute standardized difference <0.10 indicates covariate balance across exposure groups.

eFigure 2: Overlap in propensity score distributions by exposure group before and after weighting using stabilized inverse probability of treatment weights

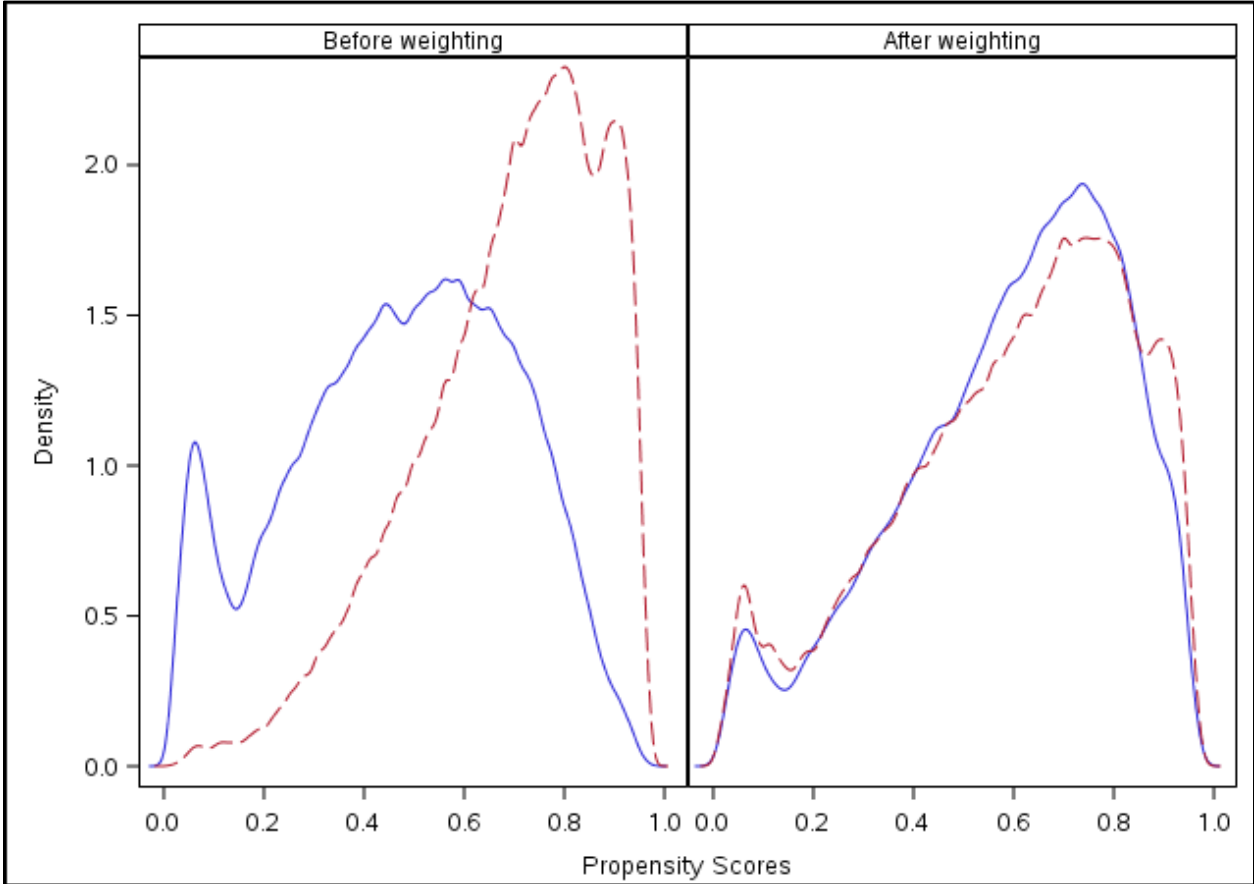

Blue solid line: maternal COVID-19 vaccine unexposed before infant birth; red dashed line: maternal COVID-19 vaccine exposed during pregnancy.

eFigure 3: Bias analyses for severe neonatal morbidity: percent bias as a function of the prevalence of the hypothetical confounder in the vaccine exposed group

A. Higher prevalence of a protective confounder in the vaccine exposed group

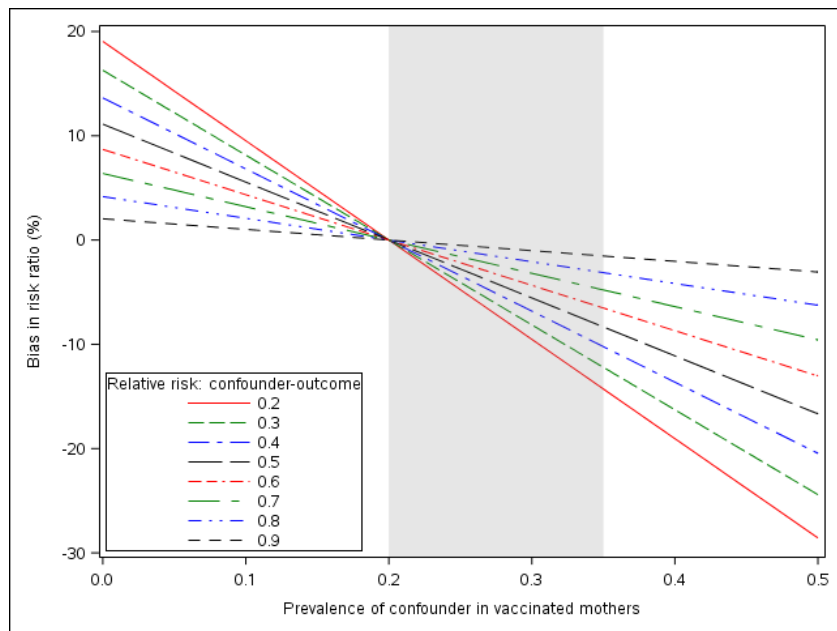

Prevalence of confounder held a 20% in the vaccine unexposed group and varied from 20% to 35% in the vaccine exposed group represented by the grey band

B. Lower prevalence of a harmful confounder in the vaccine exposed group

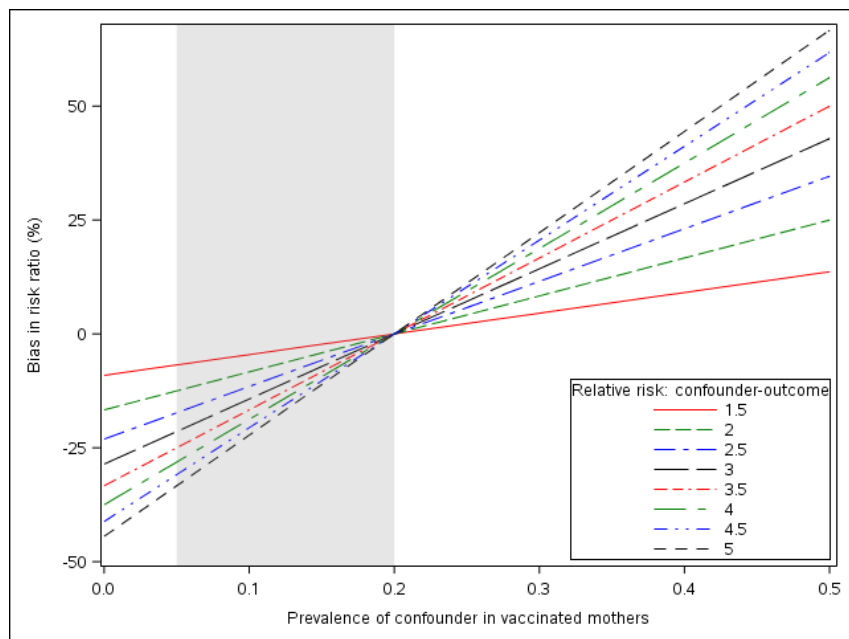

Prevalence of confounder held a 20% in the vaccine unexposed group and varied from 5% to 20% in the vaccine exposed group represented by the grey band

eTable 1: Linked health administrative databases

| <b>Database</b>                                                                  | <b>Description</b>                                                                                                                                                                                                                                                                                           |
|----------------------------------------------------------------------------------|--------------------------------------------------------------------------------------------------------------------------------------------------------------------------------------------------------------------------------------------------------------------------------------------------------------|
| Linked Delivering Mother and Newborns (MOMBABY)                                  | Deterministically linked maternal-newborn hospital delivery records and information on maternal and newborn characteristics (e.g., gestational age, birthweight), diagnoses for pre-existing health conditions (mothers) and complications that arise around the time of the delivery (mothers and newborns) |
| Registered Persons Database (RPDB)                                               | Date of birth, sex, postal code, and death date (if applicable) for Ontario residents                                                                                                                                                                                                                        |
| Canadian Institute for Health Information Discharge Abstract Database (CIHI-DAD) | Information related to acute-care hospitalizations in Ontario (e.g., sociodemographic, diagnoses, procedures, treatments, transfers, deaths)                                                                                                                                                                 |
| Ontario Health Insurance Plan (OHIP)                                             | Diagnostic and procedure information from inpatient and outpatient claims submitted by Ontario physicians for Ontario residents                                                                                                                                                                              |
| Ontario Drug Benefit (ODB)                                                       | Claims for prescription drugs and vaccines (influenza) received under the ODB program                                                                                                                                                                                                                        |
| National Ambulatory Care Reporting System (NACRS)                                | Information related to emergency department visits in Ontario                                                                                                                                                                                                                                                |
| Same Day Surgery Database (SDS)                                                  | Information related to day surgeries in Ontario                                                                                                                                                                                                                                                              |
| Ontario Asthma Dataset (ASTHMA)                                                  | Information related to asthma diagnoses                                                                                                                                                                                                                                                                      |
| Ontario Hypertension Dataset (HYPER)                                             | Information related to hypertension diagnoses                                                                                                                                                                                                                                                                |
| Ontario Diabetes Dataset (ODD)                                                   | Information related to diabetes diagnoses                                                                                                                                                                                                                                                                    |
| Canadian Organ Replacement Registry (CORR)                                       | Canadian information system with information on patients who received dialysis or transplantation                                                                                                                                                                                                            |
| Ontario Cancer Registry (OCR)                                                    | Information on Ontario residents with newly diagnosed cancer or who have died of cancer                                                                                                                                                                                                                      |
| Ontario HIV database (HIV)                                                       | Information on Ontario residents with HIV infection                                                                                                                                                                                                                                                          |
| Ontario Rheumatoid Arthritis Database (ORAD)                                     | Information on Ontario residents with rheumatoid arthritis                                                                                                                                                                                                                                                   |
| Ontario Crohn's and Colitis Cohort Dataset (OCCC)                                | Information on Ontario residents with Crohn's disease or colitis                                                                                                                                                                                                                                             |
| COVID-19 Integrated Testing Data (C19INTGR)                                      | Comprehensive dataset of all COVID-19 laboratory diagnostic testing results in Ontario                                                                                                                                                                                                                       |
| Ontario COVID-19 Vaccine Data (COVaxON)                                          | A centralized COVID-19 vaccine information system which contains comprehensive documentation (e.g., administration date, brand, dose) of all COVID-19 vaccination events in Ontario                                                                                                                          |
| Ontario Census Area Profiles (CENSUS)                                            | Data from the 2016 Canadian Census                                                                                                                                                                                                                                                                           |
| Postal Code Conversion File (PCCF)                                               | Links six-character postal codes to standard geographic areas such as dissemination area and census tracts                                                                                                                                                                                                   |

eTable 2: Severe neonatal morbidity

| <b>Component<sup>a</sup></b>                                                                                 | <b>Variable or diagnostic / procedural code</b>   |
|--------------------------------------------------------------------------------------------------------------|---------------------------------------------------|
| Gestational age < 32 weeks                                                                                   | B GESTWKS DEL (or M GESTW KS DEL)                 |
| Birth weight < 1500 grams                                                                                    | B WEIGHT                                          |
| Respiratory distress syndrome                                                                                | P22.0                                             |
| Seizures                                                                                                     | P90, R56                                          |
| Grade 2 to 4 intraventricular hemorrhage                                                                     | P52.1, P52.2                                      |
| Cerebral infarction                                                                                          | I63                                               |
| Periventricular leukomalacia                                                                                 | P91.2                                             |
| Birth trauma (intracranial hemorrhage paralysis due to brachial plexus injury, skull, or long bone fracture) | P10.0 to P10.3, P13.0, P13.2, P13.3, P14.0, P14.1 |
| Hypoxic ischemic encephalopathy                                                                              | P91.5, P91.81, P91.6                              |
| Necrotizing enterocolitis                                                                                    | P77                                               |
| Bronchopulmonary dysplasia                                                                                   | P27.1                                             |
| Sepsis/septicemia                                                                                            | P36, A40, A41.5, A41.9, B95.1, B96.2              |
| Pneumonia                                                                                                    | P23, J12 to J18                                   |
| Primary atelectasis                                                                                          | P28.0                                             |
| Respiratory failure                                                                                          | P28.5                                             |
| Resuscitation                                                                                                | 1.GZ.30                                           |
| Ventilatory support                                                                                          | 1.GZ.31                                           |
| Central venous or arterial catheter                                                                          | 1.IS.53, 1.KV.53                                  |
| Transfusion of blood or blood products                                                                       | BTANY, BTOTHER                                    |
| Pneumothorax requiring an intercostal catheter                                                               | 1.GT.33                                           |
| Death                                                                                                        |                                                   |

a. Between 0 and 27 days after birth or before discharge from the birth admission.

eTable 3: Additional analyses of the association between COVID-19 vaccination during pregnancy and neonatal and infant outcomes

| Outcome                                                             | n/N (%)                       |                      | Risk ratio or hazard ratio (95% confidence interval) |                       |
|---------------------------------------------------------------------|-------------------------------|----------------------|------------------------------------------------------|-----------------------|
|                                                                     | Vaccine exposed               | Unexposed            | Crude                                                | Adjusted <sup>a</sup> |
| <b>Number of vaccine doses during pregnancy</b>                     |                               |                      |                                                      |                       |
| <b>One vaccine dose during pregnancy</b>                            |                               |                      |                                                      |                       |
| Severe neonatal morbidity                                           | 3,177/41,621 (7.6%)           | 4,697/56,336 (8.3%)  | 0.92 (0.88-0.96)                                     | 0.91 (0.86-0.96)      |
| Neonatal death                                                      | 40/41,621 (0.10%)             | 91/56,336 (0.16%)    | 0.60 (0.41-0.86)                                     | 0.59 (0.37-0.92)      |
| Neonatal intensive care unit admission                              | 4,958/41,621 (11.9%)          | 7,391/56,336 (13.1%) | 0.91 (0.88-0.94)                                     | 0.95 (0.91-0.99)      |
| Neonatal readmission                                                | 2,303/41,082 (5.6%)           | 2,820/55,417 (5.1%)  | 1.10 (1.05-1.17)                                     | 1.07 (1.00-1.15)      |
| 6-month readmission                                                 | 1,876/21,940 (8.6%)           | 3,941/48,625 (8.1%)  | 1.06 (1.00-1.12)                                     | 1.05 (0.99-1.13)      |
| <b>Two vaccine doses during pregnancy</b>                           |                               |                      |                                                      |                       |
| Severe neonatal morbidity                                           | 2,974/42,523 (7.0%)           | 4,697/56,336 (8.3%)  | 0.84 (0.80-0.88)                                     | 0.84 (0.80-0.88)      |
| Neonatal death                                                      | 33/42,523 (0.08%)             | 91/56,336 (0.16%)    | 0.48 (0.32-0.72)                                     | 0.42 (0.28-0.65)      |
| Neonatal intensive care unit admission                              | 4,631/42,523 (10.9%)          | 7,391/56,336 (13.1%) | 0.83 (0.80-0.86)                                     | 0.82 (0.79-0.86)      |
| Neonatal readmission                                                | 2,292/42,190 (5.4%)           | 2,820/55,417 (5.1%)  | 1.07 (1.01-1.13)                                     | 1.02 (0.96-1.09)      |
| 6-month readmission                                                 | 3,392/40,465 (8.4%)           | 3,941/48,625 (8.1%)  | 1.04 (0.99-1.08)                                     | 0.99 (0.94-1.04)      |
| <b>Three vaccine doses during pregnancy<sup>b</sup></b>             |                               |                      |                                                      |                       |
| Severe neonatal morbidity                                           | 78/1,483 (5.3%)               | 886/10,783 (8.2%)    | 0.64 (0.51-0.80)                                     | 0.69 (0.51-0.92)      |
| Neonatal death                                                      | ≤5/1,483 (≤0.3%) <sup>c</sup> | 21/10,783 (0.19%)    | - <sup>c</sup>                                       | 0.70 (0.90-5.20)      |
| Neonatal intensive care unit admission                              | 131/1,483 (8.8%)              | 1,455/10,783 (13.5%) | 0.65 (0.55-0.77)                                     | 0.75 (0.60-0.92)      |
| Neonatal readmission                                                | 66/1,483 (4.5%)               | 518/10,603 (4.9%)    | 0.91 (0.70-1.17)                                     | 1.09 (0.79-1.50)      |
| 6-month readmission                                                 | 91/1,409 (6.5%)               | 685/8,165 (8.4%)     | 0.76 (0.61-0.95)                                     | 0.85 (0.65-1.11)      |
| <b>Trimester of vaccination</b>                                     |                               |                      |                                                      |                       |
| <b>At least one vaccine dose in the first trimester<sup>b</sup></b> |                               |                      |                                                      |                       |
| Severe neonatal morbidity                                           | 2,136/27,945 (7.6%)           | 3,064/37,324 (8.2%)  | 0.93 (0.88-0.98)                                     | 0.91 (0.85-0.97)      |
| Neonatal death                                                      | 33/27,945 (0.12%)             | 59/37,324 (0.16%)    | 0.75 (0.49-1.14)                                     | 0.71 (0.42-1.19)      |
| Neonatal intensive care unit admission                              | 3,275/27,945 (11.7%)          | 4,846/37,324 (13.0%) | 0.90 (0.87-0.94)                                     | 0.87 (0.83-0.92)      |
| Neonatal readmission                                                | 1,522/27,587 (5.5%)           | 1,898/36,721 (5.2%)  | 1.07 (1.00-1.14)                                     | 1.11 (1.02-1.20)      |
| 6-month readmission                                                 | 1,652/19,096 (8.7%)           | 2,594/29,647 (8.8%)  | 0.99 (0.93-1.05)                                     | 1.08 (1.00-1.17)      |
| <b>At least one vaccine dose in the second trimester</b>            |                               |                      |                                                      |                       |
| Severe neonatal morbidity                                           | 3,467/45,901 (7.6%)           | 4,697/56,336 (8.3%)  | 0.91 (0.87-0.94)                                     | 0.92 (0.87-0.96)      |
| Neonatal death                                                      | 39/45,901 (0.08%)             | 91/56,336 (0.16%)    | 0.53 (0.36-0.77)                                     | 0.55 (0.35-0.86)      |
| Neonatal intensive care unit admission                              | 5,392/45,901 (11.8%)          | 7,391/56,336 (13.1%) | 0.90 (0.87-0.93)                                     | 0.90 (0.86-0.93)      |
| Neonatal readmission                                                | 2,547/45,371 (5.6%)           | 2,820/55,417 (5.1%)  | 1.10 (1.05-1.16)                                     | 1.06 (1.00-1.13)      |
| 6-month readmission                                                 | 2,955/33,615 (8.8%)           | 3,941/48,625 (8.1%)  | 1.09 (1.04-1.14)                                     | 1.05 (1.00-1.11)      |
| <b>At least one vaccine dose in third trimester</b>                 |                               |                      |                                                      |                       |

| Outcome                                                                                 | n/N (%)                        |                      | Risk ratio or hazard ratio<br>(95% confidence interval) |                       |
|-----------------------------------------------------------------------------------------|--------------------------------|----------------------|---------------------------------------------------------|-----------------------|
|                                                                                         | Vaccine exposed                | Unexposed            | Crude                                                   | Adjusted <sup>a</sup> |
| Severe neonatal morbidity                                                               | 2,426/38,410 (6.3%)            | 4,697/56,336 (8.3%)  | 0.76 (0.72-0.79)                                        | 0.78 (0.74-0.82)      |
| Neonatal death                                                                          | 17/38,410 (0.04%)              | 91/56,336 (0.16%)    | 0.27 (0.16-0.46)                                        | 0.24 (0.14-0.41)      |
| Neonatal intensive care unit admission                                                  | 3,904/38,410 (10.2%)           | 7,391/56,336 (13.1%) | 0.77 (0.75-0.80)                                        | 0.79 (0.76-0.83)      |
| Neonatal readmission                                                                    | 2,011/38,265 (5.3%)            | 2,820/55,417 (5.1%)  | 1.03 (0.97-1.09)                                        | 1.00 (0.94-1.07)      |
| 6-month readmission                                                                     | 2,839/36,636 (7.8%)            | 3,941/48,625 (8.1%)  | 0.96 (0.91-1.00)                                        | 0.96 (0.91-1.02)      |
| <b>Vaccine product</b>                                                                  |                                |                      |                                                         |                       |
| <b>BNT162b2</b>                                                                         |                                |                      |                                                         |                       |
| Severe neonatal morbidity                                                               | 4,189/58,533 (7.2%)            | 4,697/56,336 (8.3%)  | 0.86 (0.82-0.89)                                        | 0.84 (0.81-0.88)      |
| Neonatal death                                                                          | 53/58,533 (0.09%)              | 91/56,336 (0.16%)    | 0.56 (0.40-0.79)                                        | 0.50 (0.34-0.71)      |
| Neonatal intensive care unit admission                                                  | 6,660/58,533 (11.4%)           | 7,391/56,336 (13.1%) | 0.87 (0.84-0.89)                                        | 0.86 (0.83-0.89)      |
| Neonatal readmission                                                                    | 3,192/57,927 (5.5%)            | 2,820/55,417 (5.1%)  | 1.08 (1.03-1.14)                                        | 1.03 (0.98-1.09)      |
| 6-month readmission                                                                     | 3,715/44,556 (8.3%)            | 3,941/48,625 (8.1%)  | 1.03 (0.99-1.08)                                        | 1.00 (0.95-1.05)      |
| <b>mRNA-1273</b>                                                                        |                                |                      |                                                         |                       |
| Severe neonatal morbidity                                                               | 1,545/20,215 (7.6%)            | 4,697/56,336 (8.3%)  | 0.92 (0.87-0.97)                                        | 0.91 (0.84-0.97)      |
| Neonatal death                                                                          | 17/20,215 (0.08%)              | 91/56,336 (0.16%)    | 0.52 (0.31-0.87)                                        | 0.38 (0.20-0.72)      |
| Neonatal intensive care unit admission                                                  | 2,332/20,215 (11.5%)           | 7,391/56,336 (13.1%) | 0.88 (0.84-0.92)                                        | 0.87 (0.82-0.92)      |
| Neonatal readmission                                                                    | 1,118/20,009 (5.6%)            | 2,820/55,417 (5.1%)  | 1.10 (1.03-1.18)                                        | 1.07 (0.98-1.16)      |
| 6-month readmission                                                                     | 1,099/12,546 (8.8%)            | 3,941/48,625 (8.1%)  | 1.09 (1.02-1.16)                                        | 1.05 (0.97-1.13)      |
| <b>Heterologous mRNA vaccine doses<sup>b</sup></b>                                      |                                |                      |                                                         |                       |
| Severe neonatal morbidity                                                               | 494/6,891 (7.2%)               | 3,230/39,525 (8.2%)  | 0.88 (0.80-0.96)                                        | 0.91 (0.81-1.02)      |
| Neonatal death                                                                          | ≤5/6,891 (≤0.07%) <sup>c</sup> | 62/39,525 (0.16%)    | - <sup>c</sup>                                          | 0.27 (0.09-0.81)      |
| Neonatal intensive care unit admission                                                  | 726/6,891 (10.5%)              | 5,158/39,525 (13.1%) | 0.81 (0.75-0.87)                                        | 0.79 (0.72-0.87)      |
| Neonatal readmission                                                                    | 353/6,832 (5.2%)               | 1,982/38,879 (5.1%)  | 1.01 (0.90-1.13)                                        | 1.00 (0.87-1.16)      |
| 6-month readmission                                                                     | 547/6,732 (8.1%)               | 2,995/35,276 (8.5%)  | 0.96 (0.87-1.05)                                        | 1.00 (0.89-1.12)      |
| <b>Infants of mothers vaccinated postpartum as unexposed group</b>                      |                                |                      |                                                         |                       |
| Severe neonatal morbidity                                                               | 6,229/85,670 (7.3%)            | 2,333/27,115 (8.6%)  | 0.85 (0.81-0.88)                                        | 0.81 (0.76-0.86)      |
| Neonatal death                                                                          | 74/85,670 (0.09%)              | 49/27,115 (0.18%)    | 0.48 (0.33-0.69)                                        | 0.36 (0.22-0.57)      |
| Neonatal intensive care unit admission                                                  | 9,721/85,670 (11.4%)           | 3,654/27,115 (13.5%) | 0.84 (0.81-0.87)                                        | 0.83 (0.80-0.87)      |
| Neonatal readmission                                                                    | 4,664/84,798 (5.5%)            | 1,384/26,606 (5.2%)  | 1.06 (0.99-1.12)                                        | 0.98 (0.91-1.06)      |
| 6-month readmission                                                                     | 5,361/63,834 (8.4%)            | 2,187/26,849 (8.2%)  | 1.03 (0.98-1.09)                                        | 0.96 (0.90-1.02)      |
| <b>Infants of mothers with a positive SARS-CoV-2 PCR test during pregnancy excluded</b> |                                |                      |                                                         |                       |
| Severe neonatal morbidity                                                               | 5,813/79,421 (7.3%)            | 4,325/52,113 (8.3%)  | 0.88 (0.85-0.92)                                        | 0.87 (0.83-0.91)      |
| Neonatal death                                                                          | 67/79,421 (0.08%)              | 84/52,113 (0.16%)    | 0.52 (0.38-0.72)                                        | 0.47 (0.33-0.66)      |
| Neonatal intensive care unit admission                                                  | 9,046/79,421 (11.4%)           | 6,806/52,113 (13.1%) | 0.87 (0.85-0.90)                                        | 0.86 (0.84-0.89)      |
| Neonatal readmission                                                                    | 4,355/78,602 (5.5%)            | 2,593/51,272 (5.1%)  | 1.10 (1.04-1.15)                                        | 1.04 (0.99-1.10)      |
| 6-month readmission                                                                     | 5,077/60,454 (8.4%)            | 3,661/45,279 (8.1%)  | 1.04 (1.00-1.09)                                        | 1.01 (0.96-1.06)      |



| Outcome                                                                  | n/N (%)              |                      | Risk ratio or hazard ratio<br>(95% confidence interval) |                       |
|--------------------------------------------------------------------------|----------------------|----------------------|---------------------------------------------------------|-----------------------|
|                                                                          | Vaccine exposed      | Unexposed            | Crude                                                   | Adjusted <sup>a</sup> |
| <b>Female infants</b>                                                    |                      |                      |                                                         |                       |
| Severe neonatal morbidity                                                | 2,581/41,931 (6.2%)  | 2,030/27,480 (7.4%)  | 0.83 (0.79-0.88)                                        | 0.83 (0.78-0.88)      |
| Neonatal death                                                           | 25/41,931 (0.06%)    | 40/27,480 (0.15%)    | 0.41 (0.25-0.68)                                        | 0.44 (0.26-0.75)      |
| Neonatal intensive care unit admission                                   | 4,124/41,931 (9.8%)  | 3,191/27,480 (11.6%) | 0.85 (0.81-0.88)                                        | 0.85 (0.80-0.89)      |
| Neonatal readmission                                                     | 2,087/41,578 (5.0%)  | 1,270/27,048 (4.7%)  | 1.07 (1.00-1.15)                                        | 1.02 (0.95-1.11)      |
| 6-month readmission                                                      | 2,336/31,214 (7.5%)  | 1,754/23,719 (7.4%)  | 1.01 (0.95-1.08)                                        | 0.99 (0.92-1.06)      |
| <b>Male infants</b>                                                      |                      |                      |                                                         |                       |
| Severe neonatal morbidity                                                | 3,648/43,739 (8.3%)  | 2,667/28,856 (9.2%)  | 0.90 (0.86-0.95)                                        | 0.89 (0.84-0.94)      |
| Neonatal death                                                           | 49/43,739 (0.11%)    | 51/28,856 (0.18%)    | 0.63 (0.43-0.94)                                        | 0.49 (0.32-0.75)      |
| Neonatal intensive care unit admission                                   | 5,597/43,739 (12.8%) | 4,200/28,856 (14.6%) | 0.88 (0.85-0.91)                                        | 0.87 (0.83-0.91)      |
| Neonatal readmission                                                     | 2,577/43,220 (6.0%)  | 1,550/28,369 (5.5%)  | 1.09 (1.03-1.16)                                        | 1.04 (0.97-1.12)      |
| 6-month readmission                                                      | 3,025/32,620 (9.3%)  | 2,187/24,906 (8.8%)  | 1.06 (1.00-1.12)                                        | 1.02 (0.96-1.08)      |
| <b>Excluding preterm infants (&lt;37 weeks' gestation)</b>               |                      |                      |                                                         |                       |
| Severe neonatal morbidity                                                | 4,571/80,844 (5.7%)  | 3,086/52,304 (5.9%)  | 0.96 (0.92-1.00)                                        | 0.96 (0.91-1.01)      |
| Neonatal death                                                           | 35/80,844 (0.04%)    | 34/52,304 (0.07%)    | 0.67 (0.42-1.07)                                        | 0.61 (0.36-1.04)      |
| Neonatal intensive care unit admission                                   | 6,777/80,844 (8.4%)  | 4,711/52,304 (9.0%)  | 0.93 (0.90-0.96)                                        | 0.94 (0.90-0.98)      |
| Neonatal readmission                                                     | 4,160/80,709 (5.2%)  | 2,486/52,164 (4.8%)  | 1.08 (1.03-1.14)                                        | 1.04 (0.98-1.10)      |
| 6-month readmission                                                      | 4,686/60,058 (7.8%)  | 3,383/45,074 (7.5%)  | 1.04 (1.00-1.09)                                        | 1.01 (0.96-1.06)      |
| <b>Untrimmed inverse probability of treatment weighting</b>              |                      |                      |                                                         |                       |
| Severe neonatal morbidity                                                | 6,229/85,670 (7.3%)  | 4,697/56,336 (8.3%)  | 0.87 (0.84-0.90)                                        | 0.87 (0.83-0.91)      |
| Neonatal death                                                           | 74/85,670 (0.09%)    | 91/56,336 (0.16%)    | 0.53 (0.39-0.73)                                        | 0.45 (0.32-0.64)      |
| Neonatal intensive care unit admission                                   | 9,721/85,670 (11.4%) | 7,391/56,336 (13.1%) | 0.86 (0.84-0.89)                                        | 0.86 (0.83-0.89)      |
| Neonatal readmission                                                     | 4,664/84,798 (5.5%)  | 2,820/55,417 (5.1%)  | 1.08 (1.03-1.13)                                        | 1.03 (0.97-1.09)      |
| 6-month readmission                                                      | 5,361/63,834 (8.4%)  | 3,941/48,625 (8.1%)  | 1.04 (1.00-1.08)                                        | 1.00 (0.95-1.05)      |
| <b>Birth trauma excluded from the Neonatal Adverse Outcome Indicator</b> |                      |                      |                                                         |                       |
| Severe neonatal morbidity                                                | 6,229/85,670 (7.3%)  | 4,697/56,336 (8.3%)  | 0.87 (0.84-0.90)                                        | 0.86 (0.83-0.90)      |

Abbreviation: PCR: polymerase chain reaction.

- a. Risk ratios and hazard ratios were adjusted using stabilized inverse probability of treatment weighting, trimmed at the 99<sup>th</sup> percentile. Propensity scores were respecified for each analysis. Covariates used to construct the propensity scores included infant sex; calendar month and year of conception; maternal age at infant birth; parity; pre-existing maternal medical conditions (hypertension, heart disease, diabetes mellitus, asthma, autoimmune disease, immunosuppression); maternal influenza vaccination during either the 2019-2020 or 2020-2021 influenza seasons; adequacy of prenatal care using the Revised Graduated Prenatal Care Index; maternal positive SARS-CoV-2 PCR test result during pregnancy; neighbourhood-level income quintile; neighbourhood-level proportion of the population who self-identify as a visible minority quintiles; rural residence; and Public Health Unit region. Covariates that remained unbalanced after propensity score weighting, as indicated by a standardized difference  $\geq 0.10$ , were added to weighted models.

- b. Infants with insufficient overlap in the month and year of conception by exposure group were excluded.
- c. In accordance with Ontario's privacy legislation, ICES data privacy policy prohibits us from reporting cells with fewer than 6 observations. Ranges reported in adjacent cells are to prevent back calculation of small cells.

eTable 4: Array approach sensitivity analyses for unmeasured potential confounders

| Observed adjusted risk ratio or hazard ratio in primary analysis                                            | Risk ratio or hazard ratio between confounder and outcome | Prevalence of hypothetical unmeasured confounder in vaccine exposed group | Prevalence of hypothetical unmeasured confounder in vaccine unexposed group | Risk ratio or hazard ratio adjusted for hypothetical unmeasured confounder | Percent bias <sup>a</sup> |
|-------------------------------------------------------------------------------------------------------------|-----------------------------------------------------------|---------------------------------------------------------------------------|-----------------------------------------------------------------------------|----------------------------------------------------------------------------|---------------------------|
| <b>Severe neonatal morbidity: higher prevalence of a protective confounder in the vaccine exposed group</b> |                                                           |                                                                           |                                                                             |                                                                            |                           |
| 0.86                                                                                                        | 0.20                                                      | 0.20                                                                      | 0.20                                                                        | 0.86                                                                       | 0.00                      |
| 0.86                                                                                                        | 0.30                                                      | 0.20                                                                      | 0.20                                                                        | 0.86                                                                       | 0.00                      |
| 0.86                                                                                                        | 0.40                                                      | 0.20                                                                      | 0.20                                                                        | 0.86                                                                       | 0.00                      |
| 0.86                                                                                                        | 0.50                                                      | 0.20                                                                      | 0.20                                                                        | 0.86                                                                       | 0.00                      |
| 0.86                                                                                                        | 0.60                                                      | 0.20                                                                      | 0.20                                                                        | 0.86                                                                       | 0.00                      |
| 0.86                                                                                                        | 0.70                                                      | 0.20                                                                      | 0.20                                                                        | 0.86                                                                       | 0.00                      |
| 0.86                                                                                                        | 0.80                                                      | 0.20                                                                      | 0.20                                                                        | 0.86                                                                       | 0.00                      |
| 0.86                                                                                                        | 0.90                                                      | 0.20                                                                      | 0.20                                                                        | 0.86                                                                       | 0.00                      |
| 0.86                                                                                                        | 0.20                                                      | 0.25                                                                      | 0.20                                                                        | 0.90                                                                       | -4.76                     |
| 0.86                                                                                                        | 0.30                                                      | 0.25                                                                      | 0.20                                                                        | 0.90                                                                       | -4.07                     |
| 0.86                                                                                                        | 0.40                                                      | 0.25                                                                      | 0.20                                                                        | 0.89                                                                       | -3.41                     |
| 0.86                                                                                                        | 0.50                                                      | 0.25                                                                      | 0.20                                                                        | 0.88                                                                       | -2.78                     |
| 0.86                                                                                                        | 0.60                                                      | 0.25                                                                      | 0.20                                                                        | 0.88                                                                       | -2.17                     |
| 0.86                                                                                                        | 0.70                                                      | 0.25                                                                      | 0.20                                                                        | 0.87                                                                       | -1.60                     |
| 0.86                                                                                                        | 0.80                                                      | 0.25                                                                      | 0.20                                                                        | 0.87                                                                       | -1.04                     |
| 0.86                                                                                                        | 0.90                                                      | 0.25                                                                      | 0.20                                                                        | 0.86                                                                       | -0.51                     |
| 0.86                                                                                                        | 0.20                                                      | 0.3                                                                       | 0.20                                                                        | 0.95                                                                       | -9.52                     |
| 0.86                                                                                                        | 0.30                                                      | 0.3                                                                       | 0.20                                                                        | 0.94                                                                       | -8.14                     |
| 0.86                                                                                                        | 0.40                                                      | 0.3                                                                       | 0.20                                                                        | 0.92                                                                       | -6.82                     |
| 0.86                                                                                                        | 0.50                                                      | 0.3                                                                       | 0.20                                                                        | 0.91                                                                       | -5.56                     |
| 0.86                                                                                                        | 0.60                                                      | 0.3                                                                       | 0.20                                                                        | 0.90                                                                       | -4.35                     |
| 0.86                                                                                                        | 0.70                                                      | 0.3                                                                       | 0.20                                                                        | 0.89                                                                       | -3.19                     |
| 0.86                                                                                                        | 0.80                                                      | 0.3                                                                       | 0.20                                                                        | 0.88                                                                       | -2.08                     |
| 0.86                                                                                                        | 0.90                                                      | 0.3                                                                       | 0.20                                                                        | 0.87                                                                       | -1.02                     |
| 0.86                                                                                                        | 0.20                                                      | 0.35                                                                      | 0.20                                                                        | 1.00                                                                       | -14.29                    |
| 0.86                                                                                                        | 0.30                                                      | 0.35                                                                      | 0.20                                                                        | 0.98                                                                       | -12.21                    |
| 0.86                                                                                                        | 0.40                                                      | 0.35                                                                      | 0.20                                                                        | 0.96                                                                       | -10.23                    |
| 0.86                                                                                                        | 0.50                                                      | 0.35                                                                      | 0.20                                                                        | 0.94                                                                       | -8.33                     |
| 0.86                                                                                                        | 0.60                                                      | 0.35                                                                      | 0.20                                                                        | 0.92                                                                       | -6.52                     |
| 0.86                                                                                                        | 0.70                                                      | 0.35                                                                      | 0.20                                                                        | 0.90                                                                       | -4.79                     |
| 0.86                                                                                                        | 0.80                                                      | 0.35                                                                      | 0.20                                                                        | 0.89                                                                       | -3.12                     |

| Observed adjusted risk ratio or hazard ratio in primary analysis                                        | Risk ratio or hazard ratio between confounder and outcome | Prevalence of hypothetical unmeasured confounder in vaccine exposed group | Prevalence of hypothetical unmeasured confounder in vaccine unexposed group | Risk ratio or hazard ratio adjusted for hypothetical unmeasured confounder | Percent bias <sup>a</sup> |
|---------------------------------------------------------------------------------------------------------|-----------------------------------------------------------|---------------------------------------------------------------------------|-----------------------------------------------------------------------------|----------------------------------------------------------------------------|---------------------------|
| 0.86                                                                                                    | 0.90                                                      | 0.35                                                                      | 0.20                                                                        | 0.87                                                                       | -1.53                     |
| <b>Severe neonatal morbidity: lower prevalence of a harmful confounder in the vaccine exposed group</b> |                                                           |                                                                           |                                                                             |                                                                            |                           |
| 0.86                                                                                                    | 1.50                                                      | 0.05                                                                      | 0.20                                                                        | 0.92                                                                       | -6.82                     |
| 0.86                                                                                                    | 2.00                                                      | 0.05                                                                      | 0.20                                                                        | 0.98                                                                       | -12.50                    |
| 0.86                                                                                                    | 2.50                                                      | 0.05                                                                      | 0.20                                                                        | 1.04                                                                       | -17.31                    |
| 0.86                                                                                                    | 3.00                                                      | 0.05                                                                      | 0.20                                                                        | 1.09                                                                       | -21.43                    |
| 0.86                                                                                                    | 3.50                                                      | 0.05                                                                      | 0.20                                                                        | 1.15                                                                       | -25.00                    |
| 0.86                                                                                                    | 4.00                                                      | 0.05                                                                      | 0.20                                                                        | 1.20                                                                       | -28.13                    |
| 0.86                                                                                                    | 4.50                                                      | 0.05                                                                      | 0.20                                                                        | 1.24                                                                       | -30.88                    |
| 0.86                                                                                                    | 5.00                                                      | 0.05                                                                      | 0.20                                                                        | 1.29                                                                       | -33.33                    |
| 0.86                                                                                                    | 1.50                                                      | 0.10                                                                      | 0.20                                                                        | 0.90                                                                       | -4.55                     |
| 0.86                                                                                                    | 2.00                                                      | 0.10                                                                      | 0.20                                                                        | 0.94                                                                       | -8.33                     |
| 0.86                                                                                                    | 2.50                                                      | 0.10                                                                      | 0.20                                                                        | 0.97                                                                       | -11.54                    |
| 0.86                                                                                                    | 3.00                                                      | 0.10                                                                      | 0.20                                                                        | 1.00                                                                       | -14.29                    |
| 0.86                                                                                                    | 3.50                                                      | 0.10                                                                      | 0.20                                                                        | 1.03                                                                       | -16.67                    |
| 0.86                                                                                                    | 4.00                                                      | 0.10                                                                      | 0.20                                                                        | 1.06                                                                       | -18.75                    |
| 0.86                                                                                                    | 4.50                                                      | 0.10                                                                      | 0.20                                                                        | 1.08                                                                       | -20.59                    |
| 0.86                                                                                                    | 5.00                                                      | 0.10                                                                      | 0.20                                                                        | 1.11                                                                       | -22.22                    |
| 0.86                                                                                                    | 1.50                                                      | 0.15                                                                      | 0.20                                                                        | 0.88                                                                       | -2.27                     |
| 0.86                                                                                                    | 2.00                                                      | 0.15                                                                      | 0.20                                                                        | 0.90                                                                       | -4.17                     |
| 0.86                                                                                                    | 2.50                                                      | 0.15                                                                      | 0.20                                                                        | 0.91                                                                       | -5.77                     |
| 0.86                                                                                                    | 3.00                                                      | 0.15                                                                      | 0.20                                                                        | 0.93                                                                       | -7.14                     |
| 0.86                                                                                                    | 3.50                                                      | 0.15                                                                      | 0.20                                                                        | 0.94                                                                       | -8.33                     |
| 0.86                                                                                                    | 4.00                                                      | 0.15                                                                      | 0.20                                                                        | 0.95                                                                       | -9.38                     |
| 0.86                                                                                                    | 4.50                                                      | 0.15                                                                      | 0.20                                                                        | 0.96                                                                       | -10.29                    |
| 0.86                                                                                                    | 5.00                                                      | 0.15                                                                      | 0.20                                                                        | 0.97                                                                       | -11.11                    |
| 0.86                                                                                                    | 1.50                                                      | 0.20                                                                      | 0.20                                                                        | 0.86                                                                       | 0.00                      |
| 0.86                                                                                                    | 2.00                                                      | 0.20                                                                      | 0.20                                                                        | 0.86                                                                       | 0.00                      |
| 0.86                                                                                                    | 2.50                                                      | 0.20                                                                      | 0.20                                                                        | 0.86                                                                       | 0.00                      |
| 0.86                                                                                                    | 3.00                                                      | 0.20                                                                      | 0.20                                                                        | 0.86                                                                       | 0.00                      |
| 0.86                                                                                                    | 3.50                                                      | 0.20                                                                      | 0.20                                                                        | 0.86                                                                       | 0.00                      |
| 0.86                                                                                                    | 4.00                                                      | 0.20                                                                      | 0.20                                                                        | 0.86                                                                       | 0.00                      |
| 0.86                                                                                                    | 4.50                                                      | 0.20                                                                      | 0.20                                                                        | 0.86                                                                       | 0.00                      |
| 0.86                                                                                                    | 5.00                                                      | 0.20                                                                      | 0.20                                                                        | 0.86                                                                       | 0.00                      |

| Observed adjusted risk ratio or hazard ratio in primary analysis                                 | Risk ratio or hazard ratio between confounder and outcome | Prevalence of hypothetical unmeasured confounder in vaccine exposed group | Prevalence of hypothetical unmeasured confounder in vaccine unexposed group | Risk ratio or hazard ratio adjusted for hypothetical unmeasured confounder | Percent bias <sup>a</sup> |
|--------------------------------------------------------------------------------------------------|-----------------------------------------------------------|---------------------------------------------------------------------------|-----------------------------------------------------------------------------|----------------------------------------------------------------------------|---------------------------|
| <b>Neonatal death: higher prevalence of a protective confounder in the vaccine exposed group</b> |                                                           |                                                                           |                                                                             |                                                                            |                           |
| 0.47                                                                                             | 0.20                                                      | 0.20                                                                      | 0.20                                                                        | 0.47                                                                       | 0.0                       |
| 0.47                                                                                             | 0.30                                                      | 0.20                                                                      | 0.20                                                                        | 0.47                                                                       | 0.00                      |
| 0.47                                                                                             | 0.40                                                      | 0.20                                                                      | 0.20                                                                        | 0.47                                                                       | 0.00                      |
| 0.47                                                                                             | 0.50                                                      | 0.20                                                                      | 0.20                                                                        | 0.47                                                                       | 0.00                      |
| 0.47                                                                                             | 0.60                                                      | 0.20                                                                      | 0.20                                                                        | 0.47                                                                       | 0.00                      |
| 0.47                                                                                             | 0.70                                                      | 0.20                                                                      | 0.20                                                                        | 0.47                                                                       | 0.00                      |
| 0.47                                                                                             | 0.80                                                      | 0.20                                                                      | 0.20                                                                        | 0.47                                                                       | 0.00                      |
| 0.47                                                                                             | 0.90                                                      | 0.20                                                                      | 0.20                                                                        | 0.47                                                                       | 0.00                      |
| 0.47                                                                                             | 0.20                                                      | 0.25                                                                      | 0.20                                                                        | 0.49                                                                       | -4.76                     |
| 0.47                                                                                             | 0.30                                                      | 0.25                                                                      | 0.20                                                                        | 0.49                                                                       | -4.07                     |
| 0.47                                                                                             | 0.40                                                      | 0.25                                                                      | 0.20                                                                        | 0.49                                                                       | -3.41                     |
| 0.47                                                                                             | 0.50                                                      | 0.25                                                                      | 0.20                                                                        | 0.48                                                                       | -2.78                     |
| 0.47                                                                                             | 0.60                                                      | 0.25                                                                      | 0.20                                                                        | 0.48                                                                       | -2.17                     |
| 0.47                                                                                             | 0.70                                                      | 0.25                                                                      | 0.20                                                                        | 0.48                                                                       | -1.60                     |
| 0.47                                                                                             | 0.80                                                      | 0.25                                                                      | 0.20                                                                        | 0.47                                                                       | -1.04                     |
| 0.47                                                                                             | 0.90                                                      | 0.25                                                                      | 0.20                                                                        | 0.47                                                                       | -0.51                     |
| 0.47                                                                                             | 0.20                                                      | 0.30                                                                      | 0.20                                                                        | 0.52                                                                       | -9.52                     |
| 0.47                                                                                             | 0.30                                                      | 0.30                                                                      | 0.20                                                                        | 0.51                                                                       | -8.14                     |
| 0.47                                                                                             | 0.40                                                      | 0.30                                                                      | 0.20                                                                        | 0.50                                                                       | -6.82                     |
| 0.47                                                                                             | 0.50                                                      | 0.30                                                                      | 0.20                                                                        | 0.50                                                                       | -5.56                     |
| 0.47                                                                                             | 0.60                                                      | 0.30                                                                      | 0.20                                                                        | 0.49                                                                       | -4.35                     |
| 0.47                                                                                             | 0.70                                                      | 0.30                                                                      | 0.20                                                                        | 0.49                                                                       | -3.19                     |
| 0.47                                                                                             | 0.80                                                      | 0.30                                                                      | 0.20                                                                        | 0.48                                                                       | -2.08                     |
| 0.47                                                                                             | 0.90                                                      | 0.30                                                                      | 0.20                                                                        | 0.47                                                                       | -1.02                     |
| 0.47                                                                                             | 0.20                                                      | 0.35                                                                      | 0.20                                                                        | 0.55                                                                       | -14.29                    |
| 0.47                                                                                             | 0.30                                                      | 0.35                                                                      | 0.20                                                                        | 0.54                                                                       | -12.21                    |
| 0.47                                                                                             | 0.40                                                      | 0.35                                                                      | 0.20                                                                        | 0.52                                                                       | -10.23                    |
| 0.47                                                                                             | 0.50                                                      | 0.35                                                                      | 0.20                                                                        | 0.51                                                                       | -8.33                     |
| 0.47                                                                                             | 0.60                                                      | 0.35                                                                      | 0.20                                                                        | 0.50                                                                       | -6.52                     |
| 0.47                                                                                             | 0.70                                                      | 0.35                                                                      | 0.20                                                                        | 0.49                                                                       | -4.79                     |
| 0.47                                                                                             | 0.80                                                      | 0.35                                                                      | 0.20                                                                        | 0.49                                                                       | -3.12                     |
| 0.47                                                                                             | 0.90                                                      | 0.35                                                                      | 0.20                                                                        | 0.48                                                                       | -1.53                     |
| <b>Neonatal death: lower prevalence of a harmful confounder in the vaccine exposed group</b>     |                                                           |                                                                           |                                                                             |                                                                            |                           |

| Observed adjusted risk ratio or hazard ratio in primary analysis                                                         | Risk ratio or hazard ratio between confounder and outcome | Prevalence of hypothetical unmeasured confounder in vaccine exposed group | Prevalence of hypothetical unmeasured confounder in vaccine unexposed group | Risk ratio or hazard ratio adjusted for hypothetical unmeasured confounder | Percent bias <sup>a</sup> |
|--------------------------------------------------------------------------------------------------------------------------|-----------------------------------------------------------|---------------------------------------------------------------------------|-----------------------------------------------------------------------------|----------------------------------------------------------------------------|---------------------------|
| 0.47                                                                                                                     | 1.50                                                      | 0.05                                                                      | 0.20                                                                        | 0.50                                                                       | -6.82                     |
| 0.47                                                                                                                     | 2.00                                                      | 0.05                                                                      | 0.20                                                                        | 0.54                                                                       | -12.50                    |
| 0.47                                                                                                                     | 2.50                                                      | 0.05                                                                      | 0.20                                                                        | 0.57                                                                       | -17.31                    |
| 0.47                                                                                                                     | 3.00                                                      | 0.05                                                                      | 0.20                                                                        | 0.60                                                                       | -21.43                    |
| 0.47                                                                                                                     | 3.50                                                      | 0.05                                                                      | 0.20                                                                        | 0.63                                                                       | -25.00                    |
| 0.47                                                                                                                     | 4.00                                                      | 0.05                                                                      | 0.20                                                                        | 0.65                                                                       | -28.13                    |
| 0.47                                                                                                                     | 4.50                                                      | 0.05                                                                      | 0.20                                                                        | 0.68                                                                       | -30.88                    |
| 0.47                                                                                                                     | 5.00                                                      | 0.05                                                                      | 0.20                                                                        | 0.71                                                                       | -33.33                    |
| 0.47                                                                                                                     | 1.50                                                      | 0.10                                                                      | 0.20                                                                        | 0.49                                                                       | -4.55                     |
| 0.47                                                                                                                     | 2.00                                                      | 0.10                                                                      | 0.20                                                                        | 0.51                                                                       | -8.33                     |
| 0.47                                                                                                                     | 2.50                                                      | 0.10                                                                      | 0.20                                                                        | 0.53                                                                       | -11.54                    |
| 0.47                                                                                                                     | 3.00                                                      | 0.10                                                                      | 0.20                                                                        | 0.55                                                                       | -14.29                    |
| 0.47                                                                                                                     | 3.50                                                      | 0.10                                                                      | 0.20                                                                        | 0.56                                                                       | -16.67                    |
| 0.47                                                                                                                     | 4.00                                                      | 0.10                                                                      | 0.20                                                                        | 0.58                                                                       | -18.75                    |
| 0.47                                                                                                                     | 4.50                                                      | 0.10                                                                      | 0.20                                                                        | 0.59                                                                       | -20.59                    |
| 0.47                                                                                                                     | 5.00                                                      | 0.10                                                                      | 0.20                                                                        | 0.60                                                                       | -22.22                    |
| 0.47                                                                                                                     | 1.50                                                      | 0.15                                                                      | 0.20                                                                        | 0.48                                                                       | -2.27                     |
| 0.47                                                                                                                     | 2.00                                                      | 0.15                                                                      | 0.20                                                                        | 0.49                                                                       | -4.17                     |
| 0.47                                                                                                                     | 2.50                                                      | 0.15                                                                      | 0.20                                                                        | 0.50                                                                       | -5.77                     |
| 0.47                                                                                                                     | 3.00                                                      | 0.15                                                                      | 0.20                                                                        | 0.51                                                                       | -7.14                     |
| 0.47                                                                                                                     | 3.50                                                      | 0.15                                                                      | 0.20                                                                        | 0.51                                                                       | -8.33                     |
| 0.47                                                                                                                     | 4.00                                                      | 0.15                                                                      | 0.20                                                                        | 0.52                                                                       | -9.38                     |
| 0.47                                                                                                                     | 4.50                                                      | 0.15                                                                      | 0.20                                                                        | 0.52                                                                       | -10.29                    |
| 0.47                                                                                                                     | 5.00                                                      | 0.15                                                                      | 0.20                                                                        | 0.53                                                                       | -11.11                    |
| 0.47                                                                                                                     | 1.50                                                      | 0.20                                                                      | 0.20                                                                        | 0.47                                                                       | 0.0                       |
| 0.47                                                                                                                     | 2.00                                                      | 0.20                                                                      | 0.20                                                                        | 0.47                                                                       | 0.0                       |
| 0.47                                                                                                                     | 2.50                                                      | 0.20                                                                      | 0.20                                                                        | 0.47                                                                       | 0.0                       |
| 0.47                                                                                                                     | 3.00                                                      | 0.20                                                                      | 0.20                                                                        | 0.47                                                                       | 0.0                       |
| 0.47                                                                                                                     | 3.50                                                      | 0.20                                                                      | 0.20                                                                        | 0.47                                                                       | 0.0                       |
| 0.47                                                                                                                     | 4.00                                                      | 0.20                                                                      | 0.20                                                                        | 0.47                                                                       | 0.0                       |
| 0.47                                                                                                                     | 4.50                                                      | 0.20                                                                      | 0.20                                                                        | 0.47                                                                       | 0.0                       |
| 0.47                                                                                                                     | 5.00                                                      | 0.20                                                                      | 0.20                                                                        | 0.47                                                                       | 0.0                       |
| <b>Neonatal intensive care unit admission: higher prevalence of a protective confounder in the vaccine exposed group</b> |                                                           |                                                                           |                                                                             |                                                                            |                           |
| 0.86                                                                                                                     | 0.20                                                      | 0.20                                                                      | 0.20                                                                        | 0.86                                                                       | 0.0                       |

| Observed adjusted risk ratio or hazard ratio in primary analysis                                                     | Risk ratio or hazard ratio between confounder and outcome | Prevalence of hypothetical unmeasured confounder in vaccine exposed group | Prevalence of hypothetical unmeasured confounder in vaccine unexposed group | Risk ratio or hazard ratio adjusted for hypothetical unmeasured confounder | Percent bias <sup>a</sup> |
|----------------------------------------------------------------------------------------------------------------------|-----------------------------------------------------------|---------------------------------------------------------------------------|-----------------------------------------------------------------------------|----------------------------------------------------------------------------|---------------------------|
| 0.86                                                                                                                 | 0.30                                                      | 0.20                                                                      | 0.20                                                                        | 0.86                                                                       | 0.0                       |
| 0.86                                                                                                                 | 0.40                                                      | 0.20                                                                      | 0.20                                                                        | 0.86                                                                       | 0.0                       |
| 0.86                                                                                                                 | 0.50                                                      | 0.20                                                                      | 0.20                                                                        | 0.86                                                                       | 0.0                       |
| 0.86                                                                                                                 | 0.60                                                      | 0.20                                                                      | 0.20                                                                        | 0.86                                                                       | 0.0                       |
| 0.86                                                                                                                 | 0.70                                                      | 0.20                                                                      | 0.20                                                                        | 0.86                                                                       | 0.00                      |
| 0.86                                                                                                                 | 0.80                                                      | 0.20                                                                      | 0.20                                                                        | 0.86                                                                       | 0.00                      |
| 0.86                                                                                                                 | 0.90                                                      | 0.20                                                                      | 0.20                                                                        | 0.86                                                                       | 0.00                      |
| 0.86                                                                                                                 | 0.20                                                      | 0.25                                                                      | 0.20                                                                        | 0.90                                                                       | -4.76                     |
| 0.86                                                                                                                 | 0.30                                                      | 0.25                                                                      | 0.20                                                                        | 0.90                                                                       | -4.07                     |
| 0.86                                                                                                                 | 0.40                                                      | 0.25                                                                      | 0.20                                                                        | 0.89                                                                       | -3.41                     |
| 0.86                                                                                                                 | 0.50                                                      | 0.25                                                                      | 0.20                                                                        | 0.88                                                                       | -2.78                     |
| 0.86                                                                                                                 | 0.60                                                      | 0.25                                                                      | 0.20                                                                        | 0.88                                                                       | -2.17                     |
| 0.86                                                                                                                 | 0.70                                                      | 0.25                                                                      | 0.20                                                                        | 0.87                                                                       | -1.60                     |
| 0.86                                                                                                                 | 0.80                                                      | 0.25                                                                      | 0.20                                                                        | 0.87                                                                       | -1.04                     |
| 0.86                                                                                                                 | 0.90                                                      | 0.25                                                                      | 0.20                                                                        | 0.86                                                                       | -0.51                     |
| 0.86                                                                                                                 | 0.20                                                      | 0.3                                                                       | 0.20                                                                        | 0.95                                                                       | -9.52                     |
| 0.86                                                                                                                 | 0.30                                                      | 0.3                                                                       | 0.20                                                                        | 0.94                                                                       | -8.14                     |
| 0.86                                                                                                                 | 0.40                                                      | 0.3                                                                       | 0.20                                                                        | 0.92                                                                       | -6.82                     |
| 0.86                                                                                                                 | 0.50                                                      | 0.3                                                                       | 0.20                                                                        | 0.91                                                                       | -5.56                     |
| 0.86                                                                                                                 | 0.60                                                      | 0.3                                                                       | 0.20                                                                        | 0.90                                                                       | -4.35                     |
| 0.86                                                                                                                 | 0.70                                                      | 0.3                                                                       | 0.20                                                                        | 0.89                                                                       | -3.19                     |
| 0.86                                                                                                                 | 0.80                                                      | 0.3                                                                       | 0.20                                                                        | 0.88                                                                       | -2.08                     |
| 0.86                                                                                                                 | 0.90                                                      | 0.3                                                                       | 0.20                                                                        | 0.87                                                                       | -1.02                     |
| 0.86                                                                                                                 | 0.20                                                      | 0.35                                                                      | 0.20                                                                        | 1.00                                                                       | -14.29                    |
| 0.86                                                                                                                 | 0.30                                                      | 0.35                                                                      | 0.20                                                                        | 0.98                                                                       | -12.21                    |
| 0.86                                                                                                                 | 0.40                                                      | 0.35                                                                      | 0.20                                                                        | 0.96                                                                       | -10.23                    |
| 0.86                                                                                                                 | 0.50                                                      | 0.35                                                                      | 0.20                                                                        | 0.94                                                                       | -8.33                     |
| 0.86                                                                                                                 | 0.60                                                      | 0.35                                                                      | 0.20                                                                        | 0.92                                                                       | -6.52                     |
| 0.86                                                                                                                 | 0.70                                                      | 0.35                                                                      | 0.20                                                                        | 0.90                                                                       | -4.79                     |
| 0.86                                                                                                                 | 0.80                                                      | 0.35                                                                      | 0.20                                                                        | 0.89                                                                       | -3.12                     |
| 0.86                                                                                                                 | 0.90                                                      | 0.35                                                                      | 0.20                                                                        | 0.87                                                                       | -1.53                     |
| <b>Neonatal intensive care unit admission: lower prevalence of a harmful confounder in the vaccine exposed group</b> |                                                           |                                                                           |                                                                             |                                                                            |                           |
| 0.86                                                                                                                 | 1.50                                                      | 0.05                                                                      | 0.20                                                                        | 0.92                                                                       | -6.82                     |
| 0.86                                                                                                                 | 2.00                                                      | 0.05                                                                      | 0.20                                                                        | 0.98                                                                       | -12.50                    |

| Observed adjusted risk ratio or hazard ratio in primary analysis                                       | Risk ratio or hazard ratio between confounder and outcome | Prevalence of hypothetical unmeasured confounder in vaccine exposed group | Prevalence of hypothetical unmeasured confounder in vaccine unexposed group | Risk ratio or hazard ratio adjusted for hypothetical unmeasured confounder | Percent bias <sup>a</sup> |
|--------------------------------------------------------------------------------------------------------|-----------------------------------------------------------|---------------------------------------------------------------------------|-----------------------------------------------------------------------------|----------------------------------------------------------------------------|---------------------------|
| 0.86                                                                                                   | 2.50                                                      | 0.05                                                                      | 0.20                                                                        | 1.04                                                                       | -17.31                    |
| 0.86                                                                                                   | 3.00                                                      | 0.05                                                                      | 0.20                                                                        | 1.09                                                                       | -21.43                    |
| 0.86                                                                                                   | 3.50                                                      | 0.05                                                                      | 0.20                                                                        | 1.15                                                                       | -25.00                    |
| 0.86                                                                                                   | 4.00                                                      | 0.05                                                                      | 0.20                                                                        | 1.20                                                                       | -28.13                    |
| 0.86                                                                                                   | 4.50                                                      | 0.05                                                                      | 0.20                                                                        | 1.24                                                                       | -30.88                    |
| 0.86                                                                                                   | 5.00                                                      | 0.05                                                                      | 0.20                                                                        | 1.29                                                                       | -33.33                    |
| 0.86                                                                                                   | 1.50                                                      | 0.10                                                                      | 0.20                                                                        | 0.90                                                                       | -4.55                     |
| 0.86                                                                                                   | 2.00                                                      | 0.10                                                                      | 0.20                                                                        | 0.94                                                                       | -8.33                     |
| 0.86                                                                                                   | 2.50                                                      | 0.10                                                                      | 0.20                                                                        | 0.97                                                                       | -11.54                    |
| 0.86                                                                                                   | 3.00                                                      | 0.10                                                                      | 0.20                                                                        | 1.00                                                                       | -14.29                    |
| 0.86                                                                                                   | 3.50                                                      | 0.10                                                                      | 0.20                                                                        | 1.03                                                                       | -16.67                    |
| 0.86                                                                                                   | 4.00                                                      | 0.10                                                                      | 0.20                                                                        | 1.06                                                                       | -18.75                    |
| 0.86                                                                                                   | 4.50                                                      | 0.10                                                                      | 0.20                                                                        | 1.08                                                                       | -20.59                    |
| 0.86                                                                                                   | 5.00                                                      | 0.10                                                                      | 0.20                                                                        | 1.11                                                                       | -22.22                    |
| 0.86                                                                                                   | 1.50                                                      | 0.15                                                                      | 0.20                                                                        | 0.88                                                                       | -2.27                     |
| 0.86                                                                                                   | 2.00                                                      | 0.15                                                                      | 0.20                                                                        | 0.90                                                                       | -4.17                     |
| 0.86                                                                                                   | 2.50                                                      | 0.15                                                                      | 0.20                                                                        | 0.91                                                                       | -5.77                     |
| 0.86                                                                                                   | 3.00                                                      | 0.15                                                                      | 0.20                                                                        | 0.93                                                                       | -7.14                     |
| 0.86                                                                                                   | 3.50                                                      | 0.15                                                                      | 0.20                                                                        | 0.94                                                                       | -8.33                     |
| 0.86                                                                                                   | 4.00                                                      | 0.15                                                                      | 0.20                                                                        | 0.95                                                                       | -9.38                     |
| 0.86                                                                                                   | 4.50                                                      | 0.15                                                                      | 0.20                                                                        | 0.96                                                                       | -10.29                    |
| 0.86                                                                                                   | 5.00                                                      | 0.15                                                                      | 0.20                                                                        | 0.97                                                                       | -11.11                    |
| 0.86                                                                                                   | 1.50                                                      | 0.20                                                                      | 0.20                                                                        | 0.86                                                                       | 0.00                      |
| 0.86                                                                                                   | 2.00                                                      | 0.20                                                                      | 0.20                                                                        | 0.86                                                                       | 0.00                      |
| 0.86                                                                                                   | 2.50                                                      | 0.20                                                                      | 0.20                                                                        | 0.86                                                                       | 0.00                      |
| 0.86                                                                                                   | 3.00                                                      | 0.20                                                                      | 0.20                                                                        | 0.86                                                                       | 0.00                      |
| 0.86                                                                                                   | 3.50                                                      | 0.20                                                                      | 0.20                                                                        | 0.86                                                                       | 0.00                      |
| 0.86                                                                                                   | 4.00                                                      | 0.20                                                                      | 0.20                                                                        | 0.86                                                                       | 0.00                      |
| 0.86                                                                                                   | 4.50                                                      | 0.20                                                                      | 0.20                                                                        | 0.86                                                                       | 0.00                      |
| 0.86                                                                                                   | 5.00                                                      | 0.20                                                                      | 0.20                                                                        | 0.86                                                                       | 0.00                      |
| <b>Neonatal readmission: higher prevalence of a protective confounder in the vaccine exposed group</b> |                                                           |                                                                           |                                                                             |                                                                            |                           |
| 1.03                                                                                                   | 0.20                                                      | 0.20                                                                      | 0.20                                                                        | 1.03                                                                       | 0.00                      |
| 1.03                                                                                                   | 0.30                                                      | 0.20                                                                      | 0.20                                                                        | 1.03                                                                       | 0.00                      |
| 1.03                                                                                                   | 0.40                                                      | 0.20                                                                      | 0.20                                                                        | 1.03                                                                       | 0.00                      |



| Observed adjusted risk ratio or hazard ratio in primary analysis                                   | Risk ratio or hazard ratio between confounder and outcome | Prevalence of hypothetical unmeasured confounder in vaccine exposed group | Prevalence of hypothetical unmeasured confounder in vaccine unexposed group | Risk ratio or hazard ratio adjusted for hypothetical unmeasured confounder | Percent bias <sup>a</sup> |
|----------------------------------------------------------------------------------------------------|-----------------------------------------------------------|---------------------------------------------------------------------------|-----------------------------------------------------------------------------|----------------------------------------------------------------------------|---------------------------|
| 1.03                                                                                               | 0.50                                                      | 0.20                                                                      | 0.20                                                                        | 1.03                                                                       | 0.00                      |
| 1.03                                                                                               | 0.60                                                      | 0.20                                                                      | 0.20                                                                        | 1.03                                                                       | 0.00                      |
| 1.03                                                                                               | 0.70                                                      | 0.20                                                                      | 0.20                                                                        | 1.03                                                                       | 0.00                      |
| 1.03                                                                                               | 0.80                                                      | 0.20                                                                      | 0.20                                                                        | 1.03                                                                       | 0.00                      |
| 1.03                                                                                               | 0.90                                                      | 0.20                                                                      | 0.20                                                                        | 1.03                                                                       | 0.00                      |
| 1.03                                                                                               | 0.20                                                      | 0.25                                                                      | 0.20                                                                        | 1.08                                                                       | -4.76                     |
| 1.03                                                                                               | 0.30                                                      | 0.25                                                                      | 0.20                                                                        | 1.07                                                                       | -4.07                     |
| 1.03                                                                                               | 0.40                                                      | 0.25                                                                      | 0.20                                                                        | 1.07                                                                       | -3.41                     |
| 1.03                                                                                               | 0.50                                                      | 0.25                                                                      | 0.20                                                                        | 1.06                                                                       | -2.78                     |
| 1.03                                                                                               | 0.60                                                      | 0.25                                                                      | 0.20                                                                        | 1.05                                                                       | -2.17                     |
| 1.03                                                                                               | 0.70                                                      | 0.25                                                                      | 0.20                                                                        | 1.05                                                                       | -1.60                     |
| 1.03                                                                                               | 0.80                                                      | 0.25                                                                      | 0.20                                                                        | 1.04                                                                       | -1.04                     |
| 1.03                                                                                               | 0.90                                                      | 0.25                                                                      | 0.20                                                                        | 1.04                                                                       | -0.51                     |
| 1.03                                                                                               | 0.20                                                      | 0.30                                                                      | 0.20                                                                        | 1.14                                                                       | -9.52                     |
| 1.03                                                                                               | 0.30                                                      | 0.30                                                                      | 0.20                                                                        | 1.12                                                                       | -8.14                     |
| 1.03                                                                                               | 0.40                                                      | 0.30                                                                      | 0.20                                                                        | 1.11                                                                       | -6.82                     |
| 1.03                                                                                               | 0.50                                                      | 0.30                                                                      | 0.20                                                                        | 1.09                                                                       | -5.56                     |
| 1.03                                                                                               | 0.60                                                      | 0.30                                                                      | 0.20                                                                        | 1.08                                                                       | -4.35                     |
| 1.03                                                                                               | 0.70                                                      | 0.30                                                                      | 0.20                                                                        | 1.06                                                                       | -3.19                     |
| 1.03                                                                                               | 0.80                                                      | 0.30                                                                      | 0.20                                                                        | 1.05                                                                       | -2.08                     |
| 1.03                                                                                               | 0.90                                                      | 0.30                                                                      | 0.20                                                                        | 1.04                                                                       | -1.02                     |
| 1.03                                                                                               | 0.20                                                      | 0.35                                                                      | 0.20                                                                        | 1.20                                                                       | -14.29                    |
| 1.03                                                                                               | 0.30                                                      | 0.35                                                                      | 0.20                                                                        | 1.17                                                                       | -12.21                    |
| 1.03                                                                                               | 0.40                                                      | 0.35                                                                      | 0.20                                                                        | 1.15                                                                       | -10.23                    |
| 1.03                                                                                               | 0.50                                                      | 0.35                                                                      | 0.20                                                                        | 1.12                                                                       | -8.33                     |
| 1.03                                                                                               | 0.60                                                      | 0.35                                                                      | 0.20                                                                        | 1.10                                                                       | -6.52                     |
| 1.03                                                                                               | 0.70                                                      | 0.35                                                                      | 0.20                                                                        | 1.08                                                                       | -4.79                     |
| 1.03                                                                                               | 0.80                                                      | 0.35                                                                      | 0.20                                                                        | 1.06                                                                       | -3.12                     |
| 1.03                                                                                               | 0.90                                                      | 0.35                                                                      | 0.20                                                                        | 1.05                                                                       | -1.53                     |
| <b>Neonatal readmission: lower prevalence of a harmful confounder in the vaccine exposed group</b> |                                                           |                                                                           |                                                                             |                                                                            |                           |
| 1.03                                                                                               | 1.50                                                      | 0.05                                                                      | 0.20                                                                        | 1.11                                                                       | -6.82                     |
| 1.03                                                                                               | 2.00                                                      | 0.05                                                                      | 0.20                                                                        | 1.18                                                                       | -12.50                    |
| 1.03                                                                                               | 2.50                                                      | 0.05                                                                      | 0.20                                                                        | 1.25                                                                       | -17.31                    |
| 1.03                                                                                               | 3.00                                                      | 0.05                                                                      | 0.20                                                                        | 1.31                                                                       | -21.43                    |

| Observed adjusted risk ratio or hazard ratio in primary analysis                                      | Risk ratio or hazard ratio between confounder and outcome | Prevalence of hypothetical unmeasured confounder in vaccine exposed group | Prevalence of hypothetical unmeasured confounder in vaccine unexposed group | Risk ratio or hazard ratio adjusted for hypothetical unmeasured confounder | Percent bias <sup>a</sup> |
|-------------------------------------------------------------------------------------------------------|-----------------------------------------------------------|---------------------------------------------------------------------------|-----------------------------------------------------------------------------|----------------------------------------------------------------------------|---------------------------|
| 1.03                                                                                                  | 3.50                                                      | 0.05                                                                      | 0.20                                                                        | 1.37                                                                       | -25.00                    |
| 1.03                                                                                                  | 4.00                                                      | 0.05                                                                      | 0.20                                                                        | 1.43                                                                       | -28.13                    |
| 1.03                                                                                                  | 4.50                                                      | 0.05                                                                      | 0.20                                                                        | 1.49                                                                       | -30.88                    |
| 1.03                                                                                                  | 5.00                                                      | 0.05                                                                      | 0.20                                                                        | 1.55                                                                       | -33.33                    |
| 1.03                                                                                                  | 1.50                                                      | 0.10                                                                      | 0.20                                                                        | 1.08                                                                       | -4.55                     |
| 1.03                                                                                                  | 2.00                                                      | 0.10                                                                      | 0.20                                                                        | 1.12                                                                       | -8.33                     |
| 1.03                                                                                                  | 2.50                                                      | 0.10                                                                      | 0.20                                                                        | 1.16                                                                       | -11.54                    |
| 1.03                                                                                                  | 3.00                                                      | 0.10                                                                      | 0.20                                                                        | 1.20                                                                       | -14.29                    |
| 1.03                                                                                                  | 3.50                                                      | 0.10                                                                      | 0.20                                                                        | 1.24                                                                       | -16.67                    |
| 1.03                                                                                                  | 4.00                                                      | 0.10                                                                      | 0.20                                                                        | 1.27                                                                       | -18.75                    |
| 1.03                                                                                                  | 4.50                                                      | 0.10                                                                      | 0.20                                                                        | 1.30                                                                       | -20.59                    |
| 1.03                                                                                                  | 5.00                                                      | 0.10                                                                      | 0.20                                                                        | 1.32                                                                       | -22.22                    |
| 1.03                                                                                                  | 1.50                                                      | 0.15                                                                      | 0.20                                                                        | 1.05                                                                       | -2.27                     |
| 1.03                                                                                                  | 2.00                                                      | 0.15                                                                      | 0.20                                                                        | 1.07                                                                       | -4.17                     |
| 1.03                                                                                                  | 2.50                                                      | 0.15                                                                      | 0.20                                                                        | 1.09                                                                       | -5.77                     |
| 1.03                                                                                                  | 3.00                                                      | 0.15                                                                      | 0.20                                                                        | 1.11                                                                       | -7.14                     |
| 1.03                                                                                                  | 3.50                                                      | 0.15                                                                      | 0.20                                                                        | 1.12                                                                       | -8.33                     |
| 1.03                                                                                                  | 4.00                                                      | 0.15                                                                      | 0.20                                                                        | 1.14                                                                       | -9.38                     |
| 1.03                                                                                                  | 4.50                                                      | 0.15                                                                      | 0.20                                                                        | 1.15                                                                       | -10.29                    |
| 1.03                                                                                                  | 5.00                                                      | 0.15                                                                      | 0.20                                                                        | 1.16                                                                       | -11.11                    |
| 1.03                                                                                                  | 1.50                                                      | 0.20                                                                      | 0.20                                                                        | 1.03                                                                       | 0.00                      |
| 1.03                                                                                                  | 2.00                                                      | 0.20                                                                      | 0.20                                                                        | 1.03                                                                       | 0.00                      |
| 1.03                                                                                                  | 2.50                                                      | 0.20                                                                      | 0.20                                                                        | 1.03                                                                       | 0.00                      |
| 1.03                                                                                                  | 3.00                                                      | 0.20                                                                      | 0.20                                                                        | 1.03                                                                       | 0.00                      |
| 1.03                                                                                                  | 3.50                                                      | 0.20                                                                      | 0.20                                                                        | 1.03                                                                       | 0.00                      |
| 1.03                                                                                                  | 4.00                                                      | 0.20                                                                      | 0.20                                                                        | 1.03                                                                       | 0.00                      |
| 1.03                                                                                                  | 4.50                                                      | 0.20                                                                      | 0.20                                                                        | 1.03                                                                       | 0.00                      |
| 1.03                                                                                                  | 5.00                                                      | 0.20                                                                      | 0.20                                                                        | 1.03                                                                       | 0.00                      |
| <b>6-month readmission: higher prevalence of a protective confounder in the vaccine exposed group</b> |                                                           |                                                                           |                                                                             |                                                                            |                           |
| 1.01                                                                                                  | 0.20                                                      | 0.20                                                                      | 0.20                                                                        | 1.01                                                                       | 0.00                      |
| 1.01                                                                                                  | 0.30                                                      | 0.20                                                                      | 0.20                                                                        | 1.01                                                                       | 0.00                      |
| 1.01                                                                                                  | 0.40                                                      | 0.20                                                                      | 0.20                                                                        | 1.01                                                                       | 0.00                      |
| 1.01                                                                                                  | 0.50                                                      | 0.20                                                                      | 0.20                                                                        | 1.01                                                                       | 0.00                      |
| 1.01                                                                                                  | 0.60                                                      | 0.20                                                                      | 0.20                                                                        | 1.01                                                                       | 0.00                      |

| Observed adjusted risk ratio or hazard ratio in primary analysis                                  | Risk ratio or hazard ratio between confounder and outcome | Prevalence of hypothetical unmeasured confounder in vaccine exposed group | Prevalence of hypothetical unmeasured confounder in vaccine unexposed group | Risk ratio or hazard ratio adjusted for hypothetical unmeasured confounder | Percent bias <sup>a</sup> |
|---------------------------------------------------------------------------------------------------|-----------------------------------------------------------|---------------------------------------------------------------------------|-----------------------------------------------------------------------------|----------------------------------------------------------------------------|---------------------------|
| 1.01                                                                                              | 0.70                                                      | 0.20                                                                      | 0.20                                                                        | 1.01                                                                       | 0.00                      |
| 1.01                                                                                              | 0.80                                                      | 0.20                                                                      | 0.20                                                                        | 1.01                                                                       | 0.00                      |
| 1.01                                                                                              | 0.90                                                      | 0.20                                                                      | 0.20                                                                        | 1.01                                                                       | 0.00                      |
| 1.01                                                                                              | 0.20                                                      | 0.25                                                                      | 0.20                                                                        | 1.06                                                                       | -4.76                     |
| 1.01                                                                                              | 0.30                                                      | 0.25                                                                      | 0.20                                                                        | 1.05                                                                       | -4.07                     |
| 1.01                                                                                              | 0.40                                                      | 0.25                                                                      | 0.20                                                                        | 1.05                                                                       | -3.41                     |
| 1.01                                                                                              | 0.50                                                      | 0.25                                                                      | 0.20                                                                        | 1.04                                                                       | -2.78                     |
| 1.01                                                                                              | 0.60                                                      | 0.25                                                                      | 0.20                                                                        | 1.03                                                                       | -2.17                     |
| 1.01                                                                                              | 0.70                                                      | 0.25                                                                      | 0.20                                                                        | 1.03                                                                       | -1.60                     |
| 1.01                                                                                              | 0.80                                                      | 0.25                                                                      | 0.20                                                                        | 1.02                                                                       | -1.04                     |
| 1.01                                                                                              | 0.90                                                      | 0.25                                                                      | 0.20                                                                        | 1.02                                                                       | -0.51                     |
| 1.01                                                                                              | 0.20                                                      | 0.30                                                                      | 0.20                                                                        | 1.12                                                                       | -9.52                     |
| 1.01                                                                                              | 0.30                                                      | 0.30                                                                      | 0.20                                                                        | 1.10                                                                       | -8.14                     |
| 1.01                                                                                              | 0.40                                                      | 0.30                                                                      | 0.20                                                                        | 1.08                                                                       | -6.82                     |
| 1.01                                                                                              | 0.50                                                      | 0.30                                                                      | 0.20                                                                        | 1.07                                                                       | -5.56                     |
| 1.01                                                                                              | 0.60                                                      | 0.30                                                                      | 0.20                                                                        | 1.06                                                                       | -4.35                     |
| 1.01                                                                                              | 0.70                                                      | 0.30                                                                      | 0.20                                                                        | 1.04                                                                       | -3.19                     |
| 1.01                                                                                              | 0.80                                                      | 0.30                                                                      | 0.20                                                                        | 1.03                                                                       | -2.08                     |
| 1.01                                                                                              | 0.90                                                      | 0.30                                                                      | 0.20                                                                        | 1.02                                                                       | -1.02                     |
| 1.01                                                                                              | 0.20                                                      | 0.35                                                                      | 0.20                                                                        | 1.18                                                                       | -14.29                    |
| 1.01                                                                                              | 0.30                                                      | 0.35                                                                      | 0.20                                                                        | 1.15                                                                       | -12.21                    |
| 1.01                                                                                              | 0.40                                                      | 0.35                                                                      | 0.20                                                                        | 1.13                                                                       | -10.23                    |
| 1.01                                                                                              | 0.50                                                      | 0.35                                                                      | 0.20                                                                        | 1.10                                                                       | -8.33                     |
| 1.01                                                                                              | 0.60                                                      | 0.35                                                                      | 0.20                                                                        | 1.08                                                                       | -6.52                     |
| 1.01                                                                                              | 0.70                                                      | 0.35                                                                      | 0.20                                                                        | 1.06                                                                       | -4.79                     |
| 1.01                                                                                              | 0.80                                                      | 0.35                                                                      | 0.20                                                                        | 1.04                                                                       | -3.12                     |
| 1.01                                                                                              | 0.90                                                      | 0.35                                                                      | 0.20                                                                        | 1.03                                                                       | -1.53                     |
| <b>6-month readmission: lower prevalence of a harmful confounder in the vaccine exposed group</b> |                                                           |                                                                           |                                                                             |                                                                            |                           |
| 1.01                                                                                              | 1.50                                                      | 0.05                                                                      | 0.20                                                                        | 1.08                                                                       | -6.82                     |
| 1.01                                                                                              | 2.00                                                      | 0.05                                                                      | 0.20                                                                        | 1.15                                                                       | -12.50                    |
| 1.01                                                                                              | 2.50                                                      | 0.05                                                                      | 0.20                                                                        | 1.22                                                                       | -17.31                    |
| 1.01                                                                                              | 3.00                                                      | 0.05                                                                      | 0.20                                                                        | 1.29                                                                       | -21.43                    |
| 1.01                                                                                              | 3.50                                                      | 0.05                                                                      | 0.20                                                                        | 1.35                                                                       | -25.00                    |
| 1.01                                                                                              | 4.00                                                      | 0.05                                                                      | 0.20                                                                        | 1.41                                                                       | -28.13                    |

| Observed adjusted risk ratio or hazard ratio in primary analysis | Risk ratio or hazard ratio between confounder and outcome | Prevalence of hypothetical unmeasured confounder in vaccine exposed group | Prevalence of hypothetical unmeasured confounder in vaccine unexposed group | Risk ratio or hazard ratio adjusted for hypothetical unmeasured confounder | Percent bias <sup>a</sup> |
|------------------------------------------------------------------|-----------------------------------------------------------|---------------------------------------------------------------------------|-----------------------------------------------------------------------------|----------------------------------------------------------------------------|---------------------------|
| 1.01                                                             | 4.50                                                      | 0.05                                                                      | 0.20                                                                        | 1.46                                                                       | -30.88                    |
| 1.01                                                             | 5.00                                                      | 0.05                                                                      | 0.20                                                                        | 1.52                                                                       | -33.33                    |
| 1.01                                                             | 1.50                                                      | 0.10                                                                      | 0.20                                                                        | 1.06                                                                       | -4.55                     |
| 1.01                                                             | 2.00                                                      | 0.10                                                                      | 0.20                                                                        | 1.10                                                                       | -8.33                     |
| 1.01                                                             | 2.50                                                      | 0.10                                                                      | 0.20                                                                        | 1.14                                                                       | -11.54                    |
| 1.01                                                             | 3.00                                                      | 0.10                                                                      | 0.20                                                                        | 1.18                                                                       | -14.29                    |
| 1.01                                                             | 3.50                                                      | 0.10                                                                      | 0.20                                                                        | 1.21                                                                       | -16.67                    |
| 1.01                                                             | 4.00                                                      | 0.10                                                                      | 0.20                                                                        | 1.24                                                                       | -18.75                    |
| 1.01                                                             | 4.50                                                      | 0.10                                                                      | 0.20                                                                        | 1.27                                                                       | -20.59                    |
| 1.01                                                             | 5.00                                                      | 0.10                                                                      | 0.20                                                                        | 1.30                                                                       | -22.22                    |
| 1.01                                                             | 1.50                                                      | 0.15                                                                      | 0.20                                                                        | 1.03                                                                       | -2.27                     |
| 1.01                                                             | 2.00                                                      | 0.15                                                                      | 0.20                                                                        | 1.05                                                                       | -4.17                     |
| 1.01                                                             | 2.50                                                      | 0.15                                                                      | 0.20                                                                        | 1.07                                                                       | -5.77                     |
| 1.01                                                             | 3.00                                                      | 0.15                                                                      | 0.20                                                                        | 1.09                                                                       | -7.14                     |
| 1.01                                                             | 3.50                                                      | 0.15                                                                      | 0.20                                                                        | 1.10                                                                       | -8.33                     |
| 1.01                                                             | 4.00                                                      | 0.15                                                                      | 0.20                                                                        | 1.11                                                                       | -9.38                     |
| 1.01                                                             | 4.50                                                      | 0.15                                                                      | 0.20                                                                        | 1.13                                                                       | -10.29                    |
| 1.01                                                             | 5.00                                                      | 0.15                                                                      | 0.20                                                                        | 1.14                                                                       | -11.11                    |
| 1.01                                                             | 1.50                                                      | 0.20                                                                      | 0.20                                                                        | 1.01                                                                       | 0.00                      |
| 1.01                                                             | 2.00                                                      | 0.20                                                                      | 0.20                                                                        | 1.01                                                                       | 0.00                      |
| 1.01                                                             | 2.50                                                      | 0.20                                                                      | 0.20                                                                        | 1.01                                                                       | 0.00                      |
| 1.01                                                             | 3.00                                                      | 0.20                                                                      | 0.20                                                                        | 1.01                                                                       | 0.00                      |
| 1.01                                                             | 3.50                                                      | 0.20                                                                      | 0.20                                                                        | 1.01                                                                       | 0.00                      |
| 1.01                                                             | 4.00                                                      | 0.20                                                                      | 0.20                                                                        | 1.01                                                                       | 0.00                      |
| 1.01                                                             | 4.50                                                      | 0.20                                                                      | 0.20                                                                        | 1.01                                                                       | 0.00                      |
| 1.01                                                             | 5.00                                                      | 0.20                                                                      | 0.20                                                                        | 1.01                                                                       | 0.00                      |

a. Percent bias = [(observed RR–bias-corrected RR)/(bias-corrected RR–1)] x 100.
