# Supplementary material for: Newborn and Early Infant Outcomes Following Maternal COVID-19 Vaccination During Pregnancy
Source: PubMed Central journal article supplement — JAMA Pediatr. 2023 Oct 23;177(12):1314–23. doi: 10.1001/jamapediatrics.2023.4499 (PMC10594175; doi:10.1001/jamapediatrics.2023.4499), 2023-10-23
Supplement: jamapediatr-e234499-s002.pdf [file jamapediatr-e234499-s002.pdf]

## Data Sharing Statement

Jorgensen. Newborn and Early Infant Outcomes Following Maternal COVID-19 Vaccination During Pregnancy. *JAMA Pediatr*. Published October 23, 2023.

doi:10.1001/jamapediatrics.2023.4499

### Data

**Data available:** No

### Additional Information

**Explanation for why data not available:** Data availability The dataset from this study is held securely in coded form at ICES. While legal data sharing agreements between ICES and data providers (e.g., healthcare organizations and government) prohibit ICES from making the dataset publicly available, access may be granted to those who meet pre-specified criteria for confidential access, available at <https://www.ices.on.ca/DAS> (email: [das@ices.on.ca](mailto:das@ices.on.ca)). Code availability The full dataset creation plan and underlying analytic code are available from the authors upon request, understanding that the computer programs may rely upon coding templates or macros that are unique to ICES and are therefore either inaccessible or may require modification. Correspondence and requests for materials should be addressed to JCK.
